# Supplementary material for: Cohesin architecture and clustering in vivo
Source: eLife journal article supplement (doi:10.7554/elife.62243), 2021-02-17
Supplement: supp [file elife-62243-supp-v1.zip]

Archive with 12 entries (12 files):
- elife_poa_e62243_Figure_1_figure_supplement_1.pdf
- elife_poa_e62243_Figure_2_figure_supplement_1.pdf
- elife_poa_e62243_Figure_3_figure_supplement_1.pdf
- elife_poa_e62243_Figure_4_figure_supplement_1.pdf
- elife_poa_e62243_Figure_5_figure_supplement_1.pdf
- elife_poa_e62243_Figure_5_figure_supplement_2.pdf
- elife_poa_e62243_Figure_6_figure_supplement_1.pdf
- elife_poa_e62243_Figure_7_figure_supplement_1.pdf
- elife_poa_e62243_Figure_8_figure_supplement_1.pdf
- elife_poa_e62243_Supplementary_file_1.xlsx
- elife_poa_e62243_Supplementary_file_2.docx
- elife_poa_e62243_Transparent_Reporting_File.docx
