# Supplementary material for: Cohesin architecture and clustering in vivo
Source: eLife journal article supplement (doi:10.7554/elife.62243), 2021-02-17
Supplement: supp [file elife-62243-supp-v1.zip › elife_poa_e62243_Supplementary_file_1.xlsx]

## Sheet: Supplementary File 1
Supplementary File 1: Yeast Strains.
SX48B	TIR1-CgTRP1 GFPLacI-HIS3:his3-11,15 LacO-NAT::lys4 SMC3-A1089-V5-BirA ura3-52 bar1 GAL+ SMC3-(P533-AviTag-6HA)-LEU2:leu2-3,112
SX48E	TIR1-CgTRP1 GFPLacI-HIS3:his3-11,15 LacO-NAT::lys4 SMC3-A1089-V5-BirA ura3-52 bar1 GAL+ SMC3-(V966-AviTag-6HA)-LEU2:leu2-3,112
SX48F	TIR1-CgTRP1 GFPLacI-HIS3:his3-11,15 LacO-NAT::lys4 SMC3-A1089-V5-BirA ura3-52 bar1 GAL+ SMC3-(A1089-AviTag-6HA)-LEU2:leu2-3,112
SX49B	TIR1-CgTRP1 GFPLacI-HIS3:his3-11,15 LacO-NAT::lys4 SMC3-A1089-V5-BirA ura3-52 bar1 GAL+ smc3-D667-(P533-AviTag-6HA)-LEU2:leu2-3,112
SX49F	TIR1-CgTRP1 GFPLacI-HIS3:his3-11,15 LacO-NAT::lys4 SMC3-A1089-V5-BirA ura3-52 bar1 GAL+ smc3-D667-(A1089-AviTag-6HA)-LEU2:leu2-3,112
SX66B	TIR1-CgTRP1 GFPLacI-HIS3:his3-11,15 LacO-NAT::lys4 SMC3-A1089-V5-BirA ura3-52 bar1 GAL+ SMC3-(P533-AviTag-6HA)-LEU2:leu2-3,112 wpl∆::HPH
SX66F	TIR1-CgTRP1 GFPLacI-HIS3:his3-11,15 LacO-NAT::lys4 SMC3-A1089-V5-BirA ura3-52 bar1 GAL+ SMC3-(A1089-AviTag-6HA)-LEU2:leu2-3,112 wpl∆::HPH
SX73	TIR1-CgTRP1 LacO-NAT::lys4 GFPLacI-HIS3:his3-11,15 SMC3-(A1089-AviTag-6HA)-LEU2:leu2-3,112 ura3-52 bar1 GAL+
SX74	TIR1-CgTRP1 GFPLacI-HIS3:his3-11,15 SMC3-A1089-V5-BirA ura3-52 bar1 GAL+ SMC3-(A1089-dead-AviTag-6HA)-LEU2:leu2-3,112
SX80B	TIR1-CgTRP1 LacO-NAT::lys4 GFPLacI-HIS3:his3-11,15 GAL1p-NLS-V5-BirA-URA3::ura3-52 SMC3-(P533-AviTag-6HA)-LEU2:leu2-3,112 leu2-3,112 ura3-52 bar1 GAL+
SX80D	TIR1-CgTRP1 LacO-NAT::lys4 GFPLacI-HIS3:his3-11,15 GAL1p-NLS-V5-BirA-URA3::ura3-52 SMC3-(F864-AviTag-6HA)-LEU2:leu2-3,112 leu2-3,112 ura3-52 bar1 GAL+
SX80E	TIR1-CgTRP1 LacO-NAT::lys4 GFPLacI-HIS3:his3-11,15 GAL1p-NLS-V5-BirA-URA3::ura3-52 SMC3-(V966-AviTag-6HA)-LEU2:leu2-3,112 leu2-3,112 ura3-52 bar1 GAL+
SX80F	TIR1-CgTRP1 LacO-NAT::lys4 GFPLacI-HIS3:his3-11,15 GAL1p-NLS-V5-BirA-URA3::ura3-52 SMC3-(A1089-AviTag-6HA)-LEU2:leu2-3,112 leu2-3,112 ura3-52 bar1 GAL+
SX81B	TIR1-CgTRP1 GFPLacI-HIS3:his3-11,15 LacO-NAT::lys4 SMC3-A1089-V5-BirA ura3-52 bar1 GAL+ SMC3-(P533-AviTag-6HA)-LEU2:leu2-3,112 ECO1-3V5-AID2:G418
SX81F	TIR1-CgTRP1 GFPLacI-HIS3:his3-11,15 LacO-NAT::lys4 SMC3-A1089-V5-BirA ura3-52 bar1 GAL+ SMC3-(A1089-AviTag-6HA)-LEU2:leu2-3,112 ECO1-3V5-AID2:G418
SX82B	TIR1-CgTRP1 GFPLacI-HIS3:his3-11,15 LacO-NAT::lys4 SMC3-A1089-V5-BirA ura3-52 bar1 GAL+ SMC3-(P533-AviTag-6HA)-LEU2:leu2-3,112 SCC2-3FLAG-AID2:HYG
SX82F	TIR1-CgTRP1 GFPLacI-HIS3:his3-11,15 LacO-NAT::lys4 SMC3-A1089-V5-BirA ura3-52 bar1 GAL+ SMC3-(A1089-AviTag-6HA)-LEU2:leu2-3,112 SCC2-3FLAG-AID2:HYG
SX122B	TIR1-CgTRP1 GFPLacI-HIS3:his3-11,15 LacO-NAT::lys4 SMC3-A1089-V5-BirA ura3-52 bar1 GAL+ SMC3-(P533-AviTag-6HA)-LEU2:leu2-3,112 PDS5-3V5-AID2:G418
SX122F	TIR1-CgTRP1 GFPLacI-HIS3:his3-11,15 LacO-NAT::lys4 SMC3-A1089-V5-BirA ura3-52 bar1 GAL+ SMC3-(A1089-AviTag-6HA)-LEU2:leu2-3,112 PDS5-3V5-AID2:G418
SX129	trp1-1::cgTRP1-TIR1 GFPLacI-HIS3:his3-11,15 bar1 GAL+ MCD1-AID-G418 ura3-52::mcd1-Q266-6HA-URA3 SMC3-A1089-V5-BirA SMC3-(P533-AviTag-6HA)-LEU2:leu2-3,112
SX130	trp1-1::cgTRP1-TIR1 GFPLacI-HIS3:his3-11,15 bar1 GAL+ MCD1-AID-G418 ura3-52::mcd1-V137K-6HA-URA3 SMC3-A1089-V5-BirA SMC3-(P533-AviTag-6HA)-LEU2:leu2-3,112
SX134	trp1-1::cgTRP1-TIR1 GFPLacI-HIS3:his3-11,15 bar1 GAL+ MCD1-AID-G418 ura3-52::MCD1-6HA-URA3 SMC3-A1089-V5-BirA SMC3-(P533-AviTag-6HA)-LEU2:leu2-3,112
SX136B	TIR1-cgTRP1:trp1-1 CARC1::4x(tetO-lacO) his3-11,15:HUalpha-BirA-HIS3 leu2-3,112:SMC3-(P533-AviTag-6HA)-LEU2 ura3-52 lys2-801 bar1 GAL+
SX136D	TIR1-cgTRP1:trp1-1 CARC1::4x(tetO-lacO) his3-11,15:HUalpha-BirA-HIS3 leu2-3,112:SMC3-(F864-AviTag-6HA)-LEU2 ura3-52 lys2-801 bar1 GAL+
SX136E	TIR1-cgTRP1:trp1-1 CARC1::4x(tetO-lacO) his3-11,15:HUalpha-BirA-HIS3 leu2-3,112:SMC3-(V966-AviTag-6HA)-LEU2 ura3-52 lys2-801 bar1 GAL+
SX136F	TIR1-cgTRP1:trp1-1 CARC1::4x(tetO-lacO) his3-11,15:HUalpha-BirA-HIS3 leu2-3,112:SMC3-(A1089-AviTag-6HA)-LEU2 ura3-52 lys2-801 bar1 GAL+
SX155	TIR1-CgTRP1 GFPLacI-HIS3:his3-11,15 LacO-NAT::lys4 SMC3-A1089-V5-BirA ura3-52 bar1 GAL+ SMC3wt-13myc-AviTag-LEU2:leu2-3,112
SX158	TIR1-CgTRP1 LacO-NAT::lys4 GFPLacI-HIS3:his3-11,15 SMC3-A1089-V5-BirA PDS5-3V5-AID2:G418 scc2-3FLAG-AID2:HYG leu2-3,112::SMC3-P533-Avi6HA-LEU2 ura3-52 bar1 GAL+
SX165	TIR1-CgTRP1 GFPLacI-HIS3:his3-11,15 LacO-NAT::lys4(lost) SMC3-A1089-V5-BirA ura3-52:pGAL-MCD1-URA3 SMC3wt-P533-[AviTag-6HA]-LEU2:leu2-3,112 bar1 GAL+
SX172	TIR1-CgTRP1 GFPLacI-HIS3:his3-11,15 LacO-NAT::lys4 SMC3-13myc-AviTag-LEU2:leu2-3,112 ura3-52 bar1 GAL+
SX173	TIR1-CgTRP1 LacO-NAT::lys4 GFPLacI-HIS3:his3-11,15 GAL1p-NLS-V5-BirA-URA3::ura3-52 bar1 GAL+ SMC3-13myc-AviTag-LEU2:leu2-3,112
SX220B	TIR1-CgTRP1 LacO-NAT::lys4 GFPLacI-HIS3:his3-11,15 SMC3-A1089-V5-BirA leu2-3,112:SMC3-(P533-AviTag-6HA)-LEU2
SX220F	TIR1-CgTRP1 LacO-NAT::lys4 GFPLacI-HIS3:his3-11,15 SMC3-A1089-V5-BirA leu2-3,112:SMC3-(A1089-AviTag-6HA)-LEU2 scc3-3V5-AID2-G418 ura3-52 bar1 GAL+
SX221B	TIR1-cgTRP1:trp1-1 ura3-52 lys2-801 bar1 GAL+ CARC1::4x(tetO-lacO) his3-11,15:HUalpha-BirA-HIS3 scc2-3FLAG-AID2:HYG leu2-3,112:SMC3-(P533-AviTag-6HA)-LEU2
SX221D	TIR1-cgTRP1:trp1-1 ura3-52 lys2-801 bar1 GAL+ CARC1::4x(tetO-lacO) his3-11,15:HUalpha-BirA-HIS3 scc2-3FLAG-AID2:HYG leu2-3,112:SMC3-(F864-AviTag-6HA)-LEU2
SX221E	TIR1-cgTRP1:trp1-1 ura3-52 lys2-801 bar1 GAL+ CARC1::4x(tetO-lacO) his3-11,15:HUalpha-BirA-HIS3 scc2-3FLAG-AID2:HYG leu2-3,112:SMC3-(V966-AviTag-6HA)-LEU2
SX221F	TIR1-cgTRP1:trp1-1 ura3-52 lys2-801 bar1 GAL+ CARC1::4x(tetO-lacO) his3-11,15:HUalpha-BirA-HIS3 scc2-3FLAG-AID2:HYG leu2-3,112:SMC3-(A1089-AviTag-6HA)-LEU2
SX222	TIR1-CgTRP1 LacO-NAT::lys4 GFPLacI-HIS3:his3-11,15 pGAL1-(NLS-BirA)-URA3::ura3-52 SMC3-A1089-(dead-AviTag-6HA)-LEU2::leu2-3,112 bar1 GAL+
SX246	PDS5-3V5-AID2:G418 TIR1-CgTRP1 LacO-NAT::lys4 GFPLacI-HIS3:his3-11,15 ura3-52 bar1 GAL+ leu2-3,112::SMC3-(P533-Avi6HA)-(A1089-V5BirA)-LEU2
SX247	PDS5-3V5-AID2:G418 TIR1-CgTRP1 LacO-NAT::lys4 GFPLacI-HIS3:his3-11,15 ura3-52 bar1 GAL+ leu2-3,112::SMC3-(P533-V5BirA)-(F864-Avi6HA)-LEU2
SX248	PDS5-3V5-AID2:G418 TIR1-CgTRP1 LacO-NAT::lys4 GFPLacI-HIS3:his3-11,15 ura3-52 bar1 GAL+ leu2-3,112::SMC3-(P533-V5BirA)-(V966-Avi6HA)-LEU2
SX249	TIR1-CgTRP1 LacO-NAT::lys4 GFPLacI-HIS3:his3-11,15 leu2-3,112::SMC3-(A1089-V5-BirA)-(F864-Avi6HA)-LEU2 PDS5-3V5-AID2:G418 ura3-52 bar1 GAL+
SX250	TIR1-CgTRP1 LacO-NAT::lys4 GFPLacI-HIS3:his3-11,15 leu2-3,112::SMC3-(A1089-V5-BirA)-(V966-Avi6HA)-LEU2 PDS5-3V5-AID2:G418 ura3-52 bar1 GAL+
