# Supplementary figures and images for: Cohesin architecture and clustering in vivo
Source: eLife journal article supplement (doi:10.7554/elife.62243), 2021-02-17

Figure 5S1

A

S Phase Arrested Cells

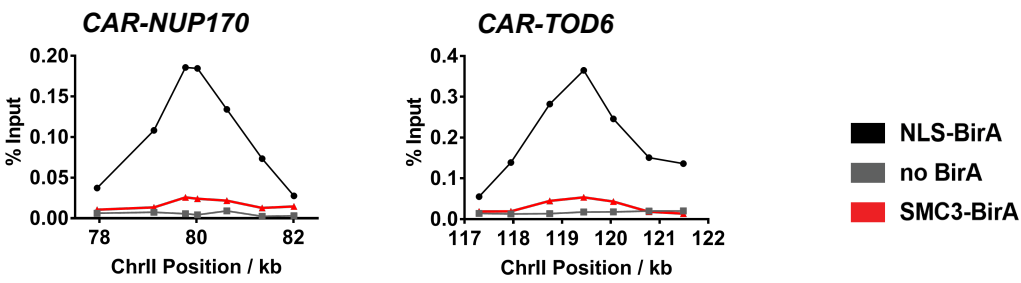

B

mid-M Arrested Cells

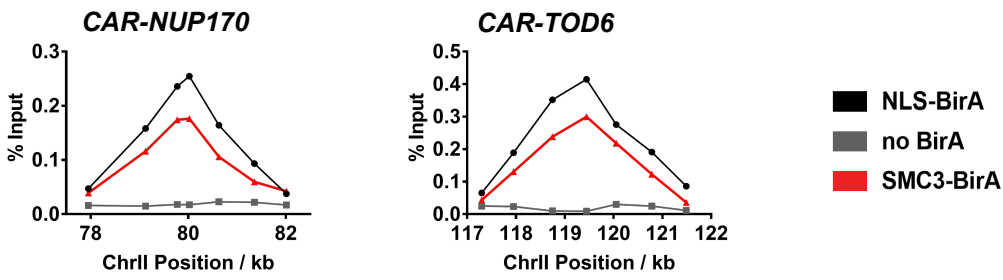

C

chrIII: 0-313 kb

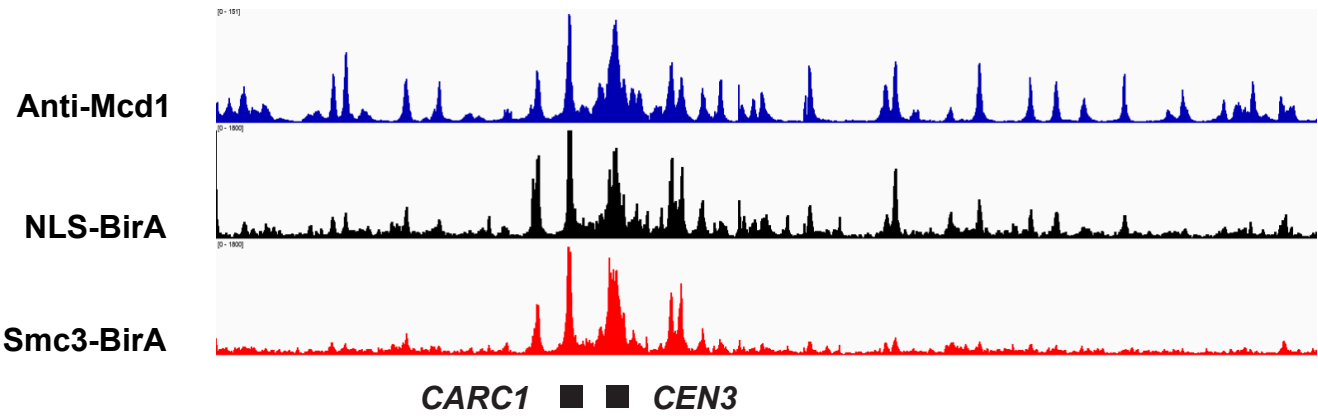

D

chrI: 0-230 kb

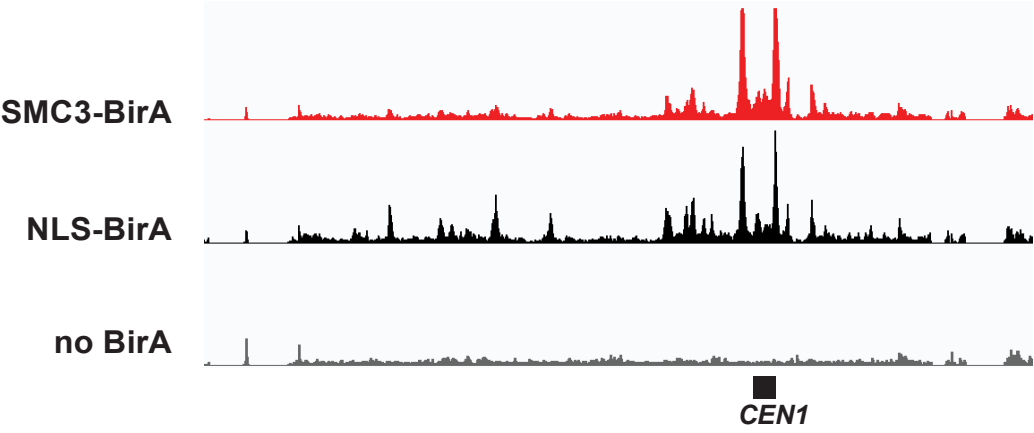

chrII: 0-340 kb

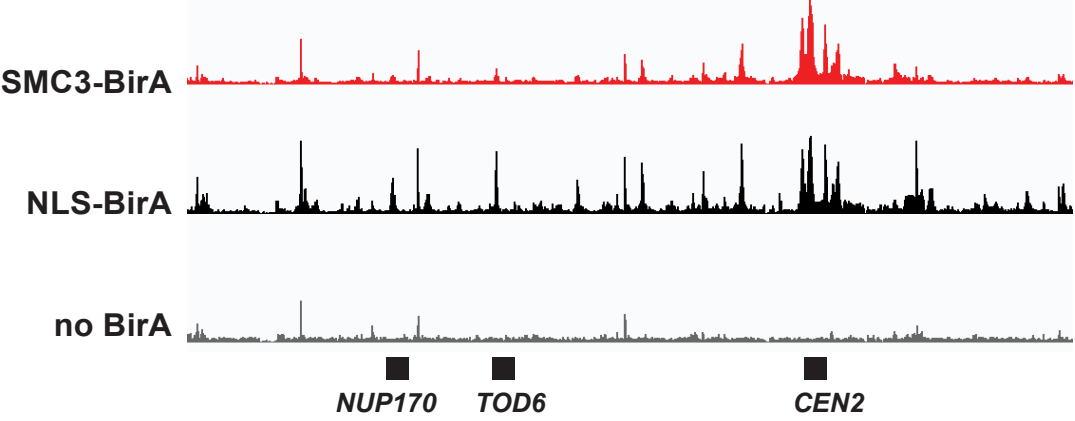

Supplement: supp [file elife-62243-supp-v1.zip]

**Figure 1S1**

**A**

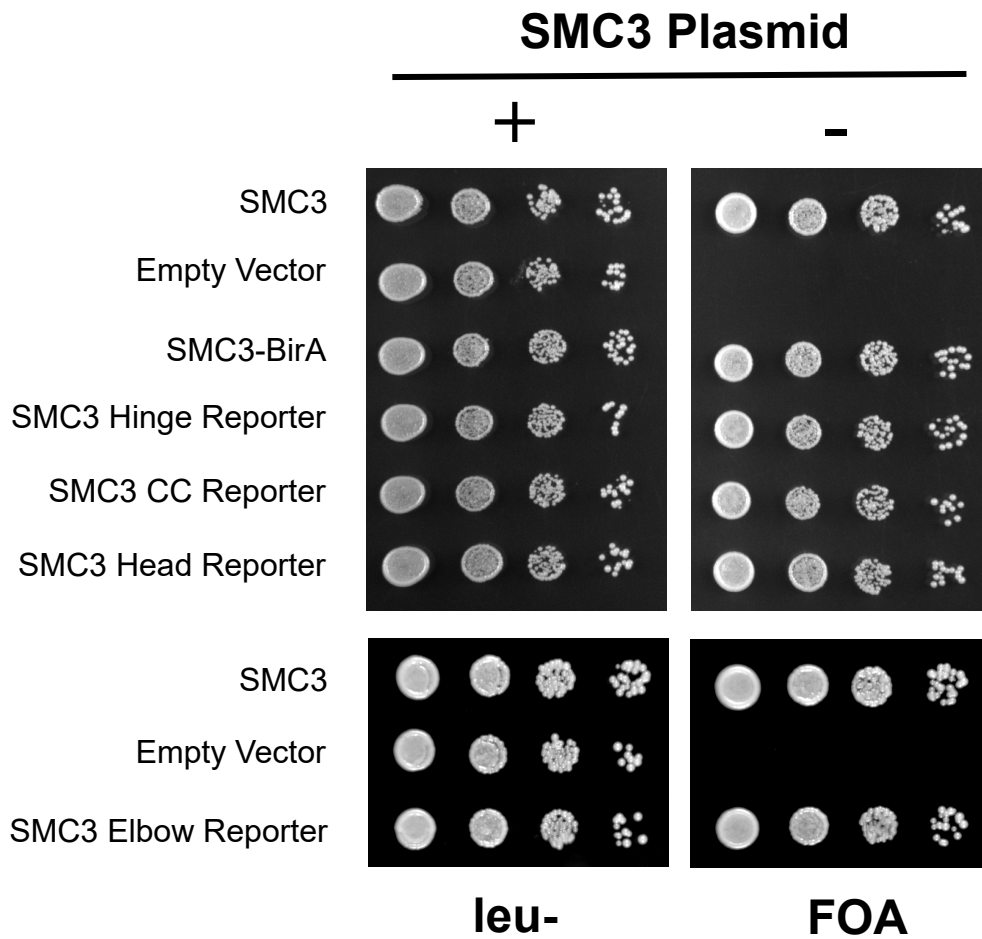

**B**

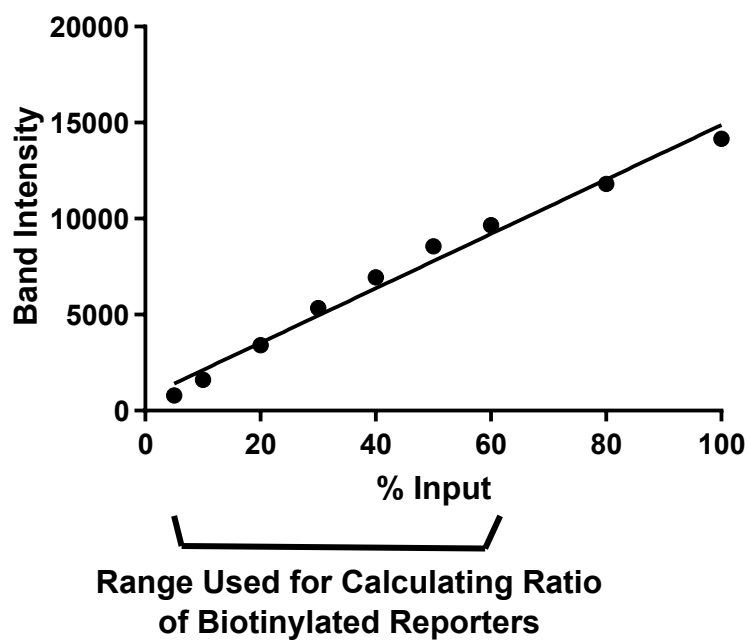

Supplement: supp [file elife-62243-supp-v1.zip › elife_poa_e62243_Figure_1_figure_supplement_1.pdf]

Figure 2S1

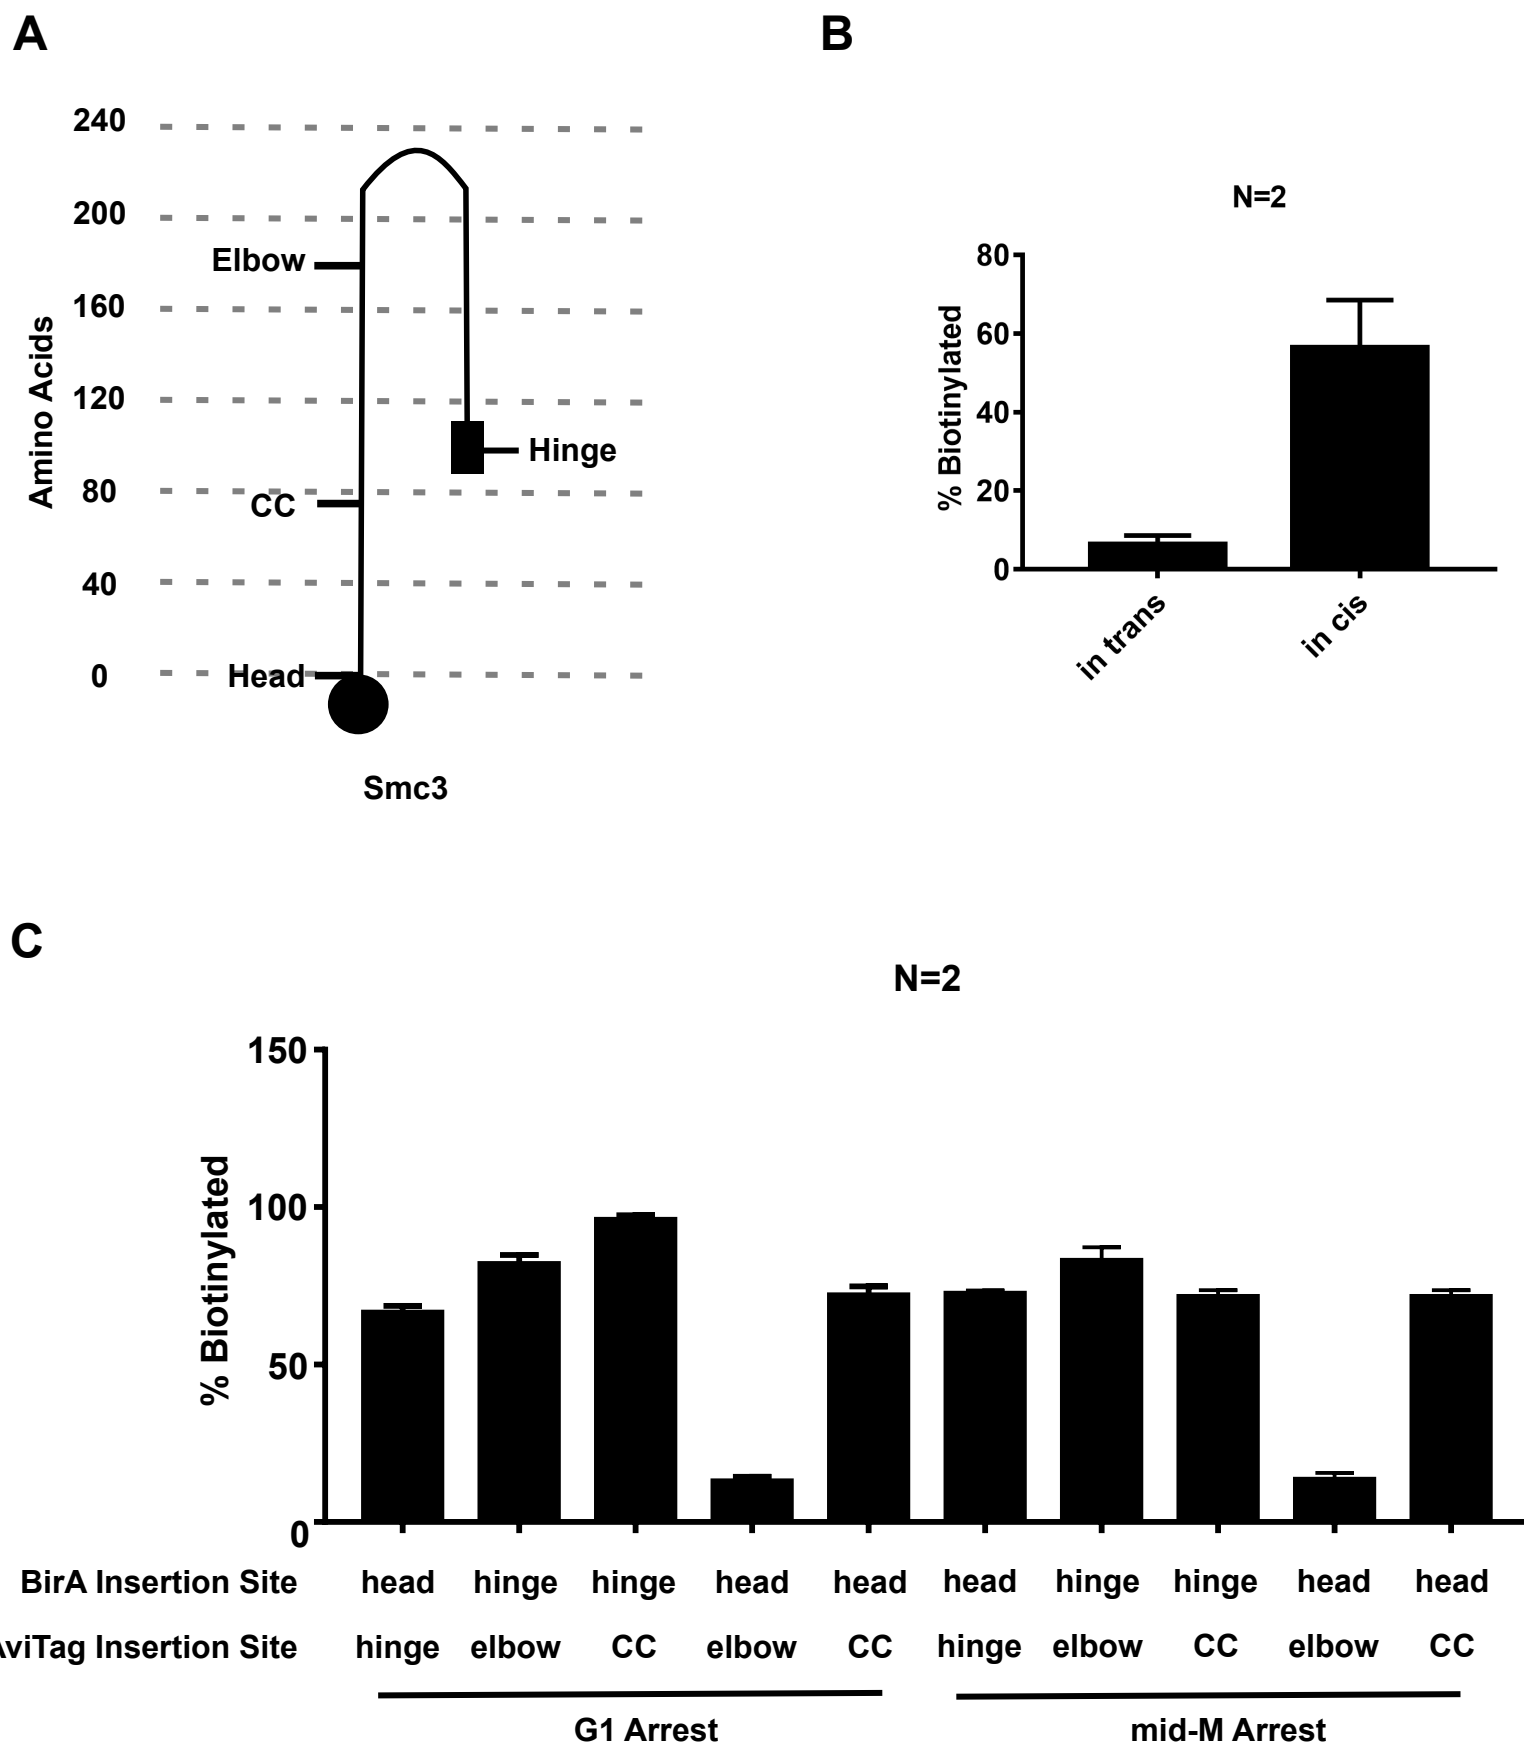

Supplement: supp [file elife-62243-supp-v1.zip › elife_poa_e62243_Figure_2_figure_supplement_1.pdf]

Figure 3S1

A

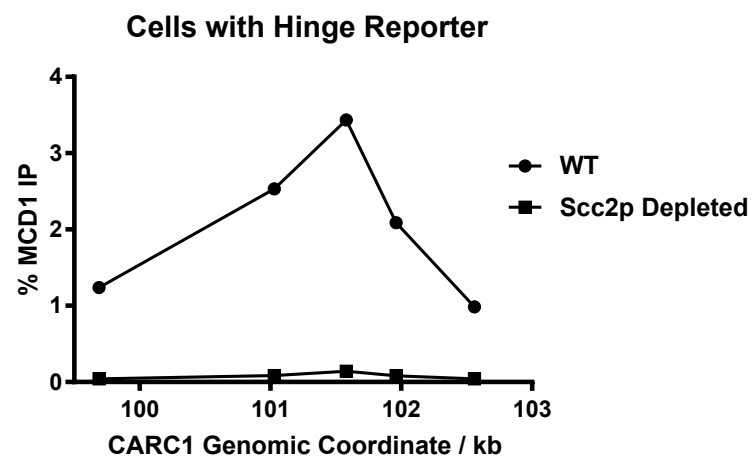

B

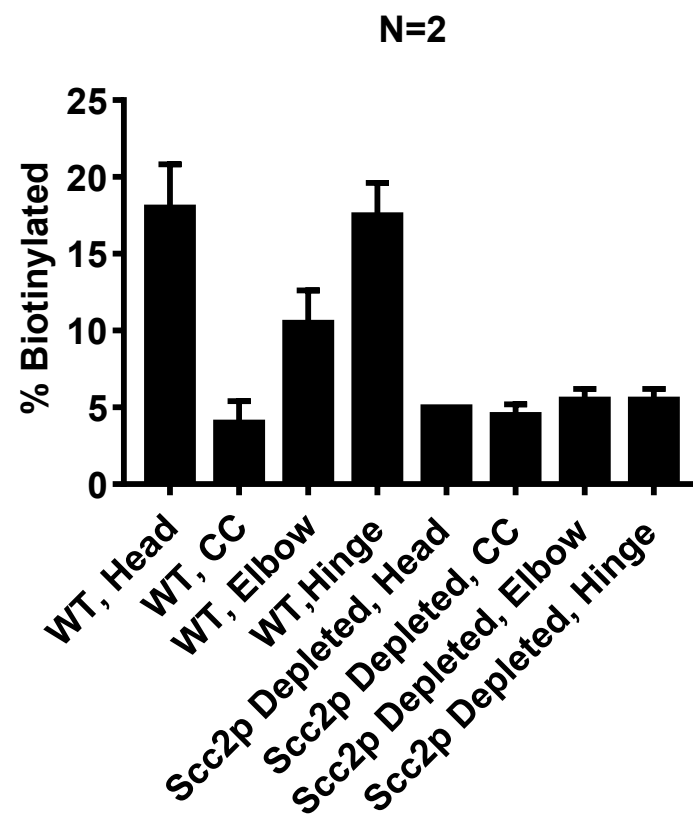

Supplement: supp [file elife-62243-supp-v1.zip › elife_poa_e62243_Figure_3_figure_supplement_1.pdf]

Figure 4S1

A

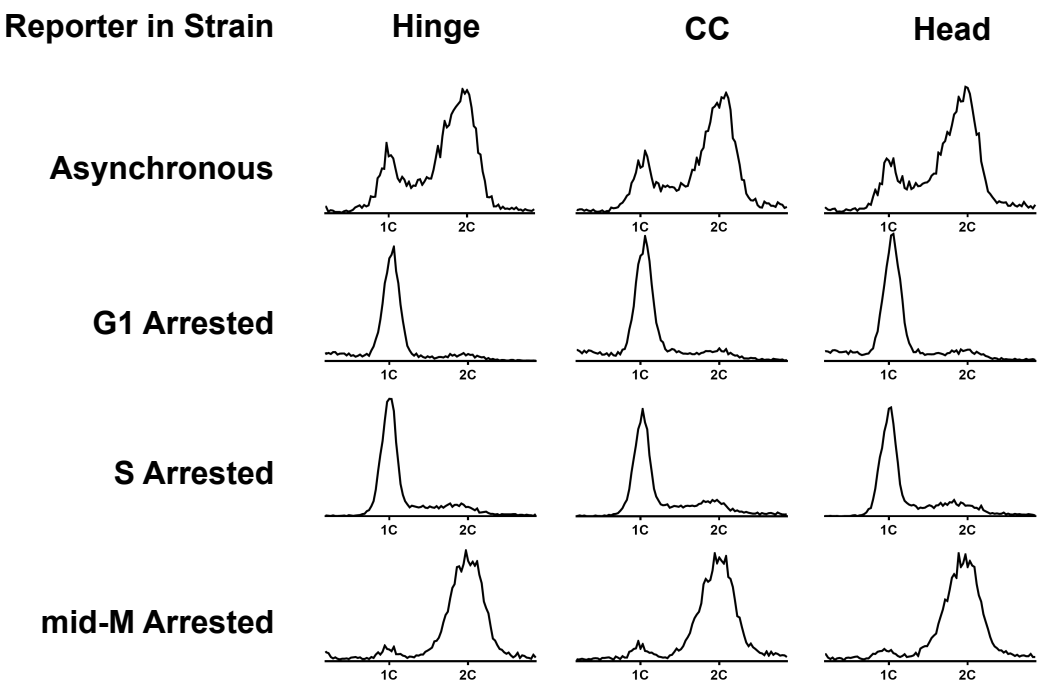

B

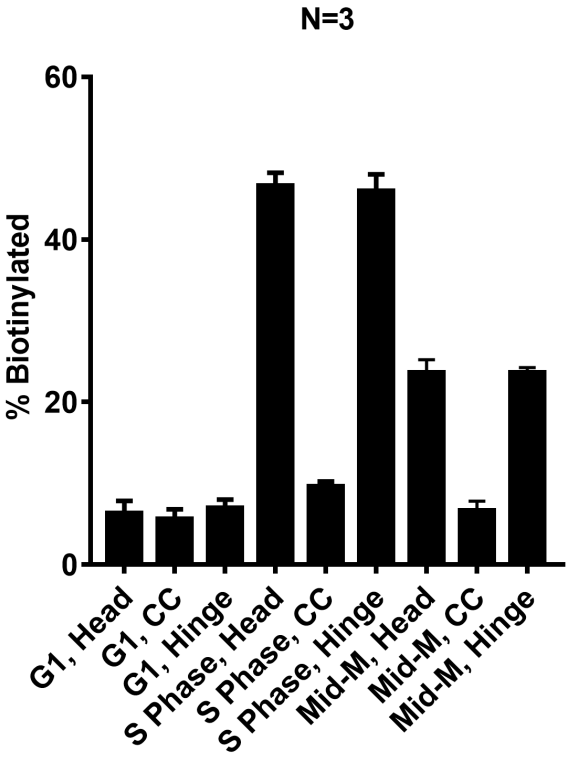

C

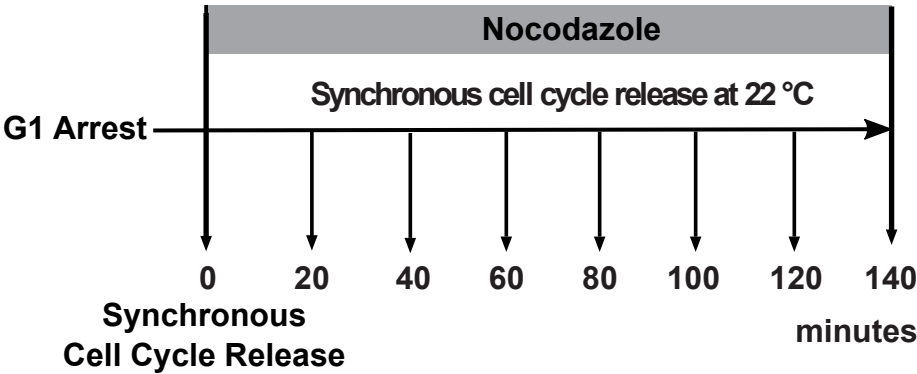

D

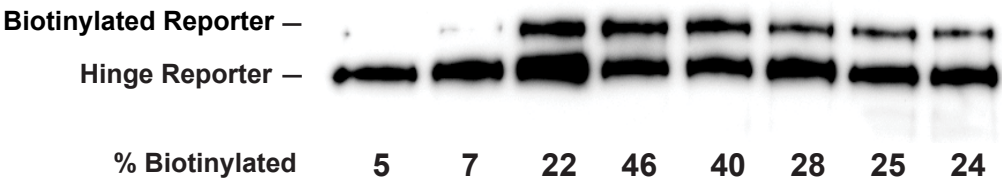

E

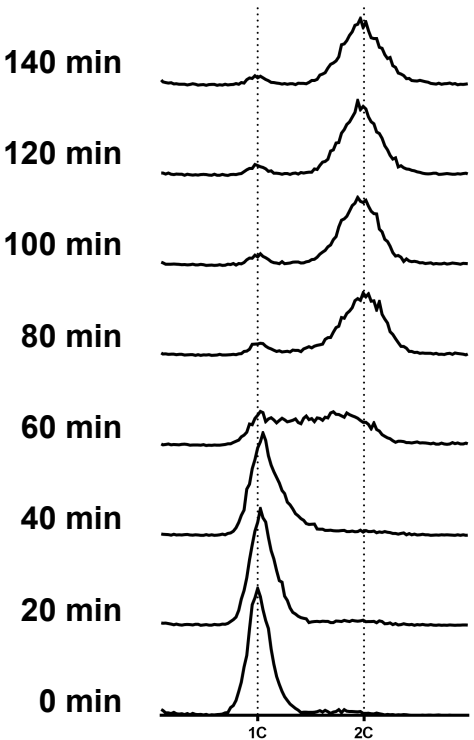

F

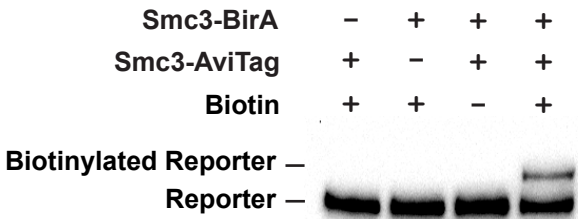

Supplement: supp [file elife-62243-supp-v1.zip › elife_poa_e62243_Figure_4_figure_supplement_1.pdf]

Figure 5S2

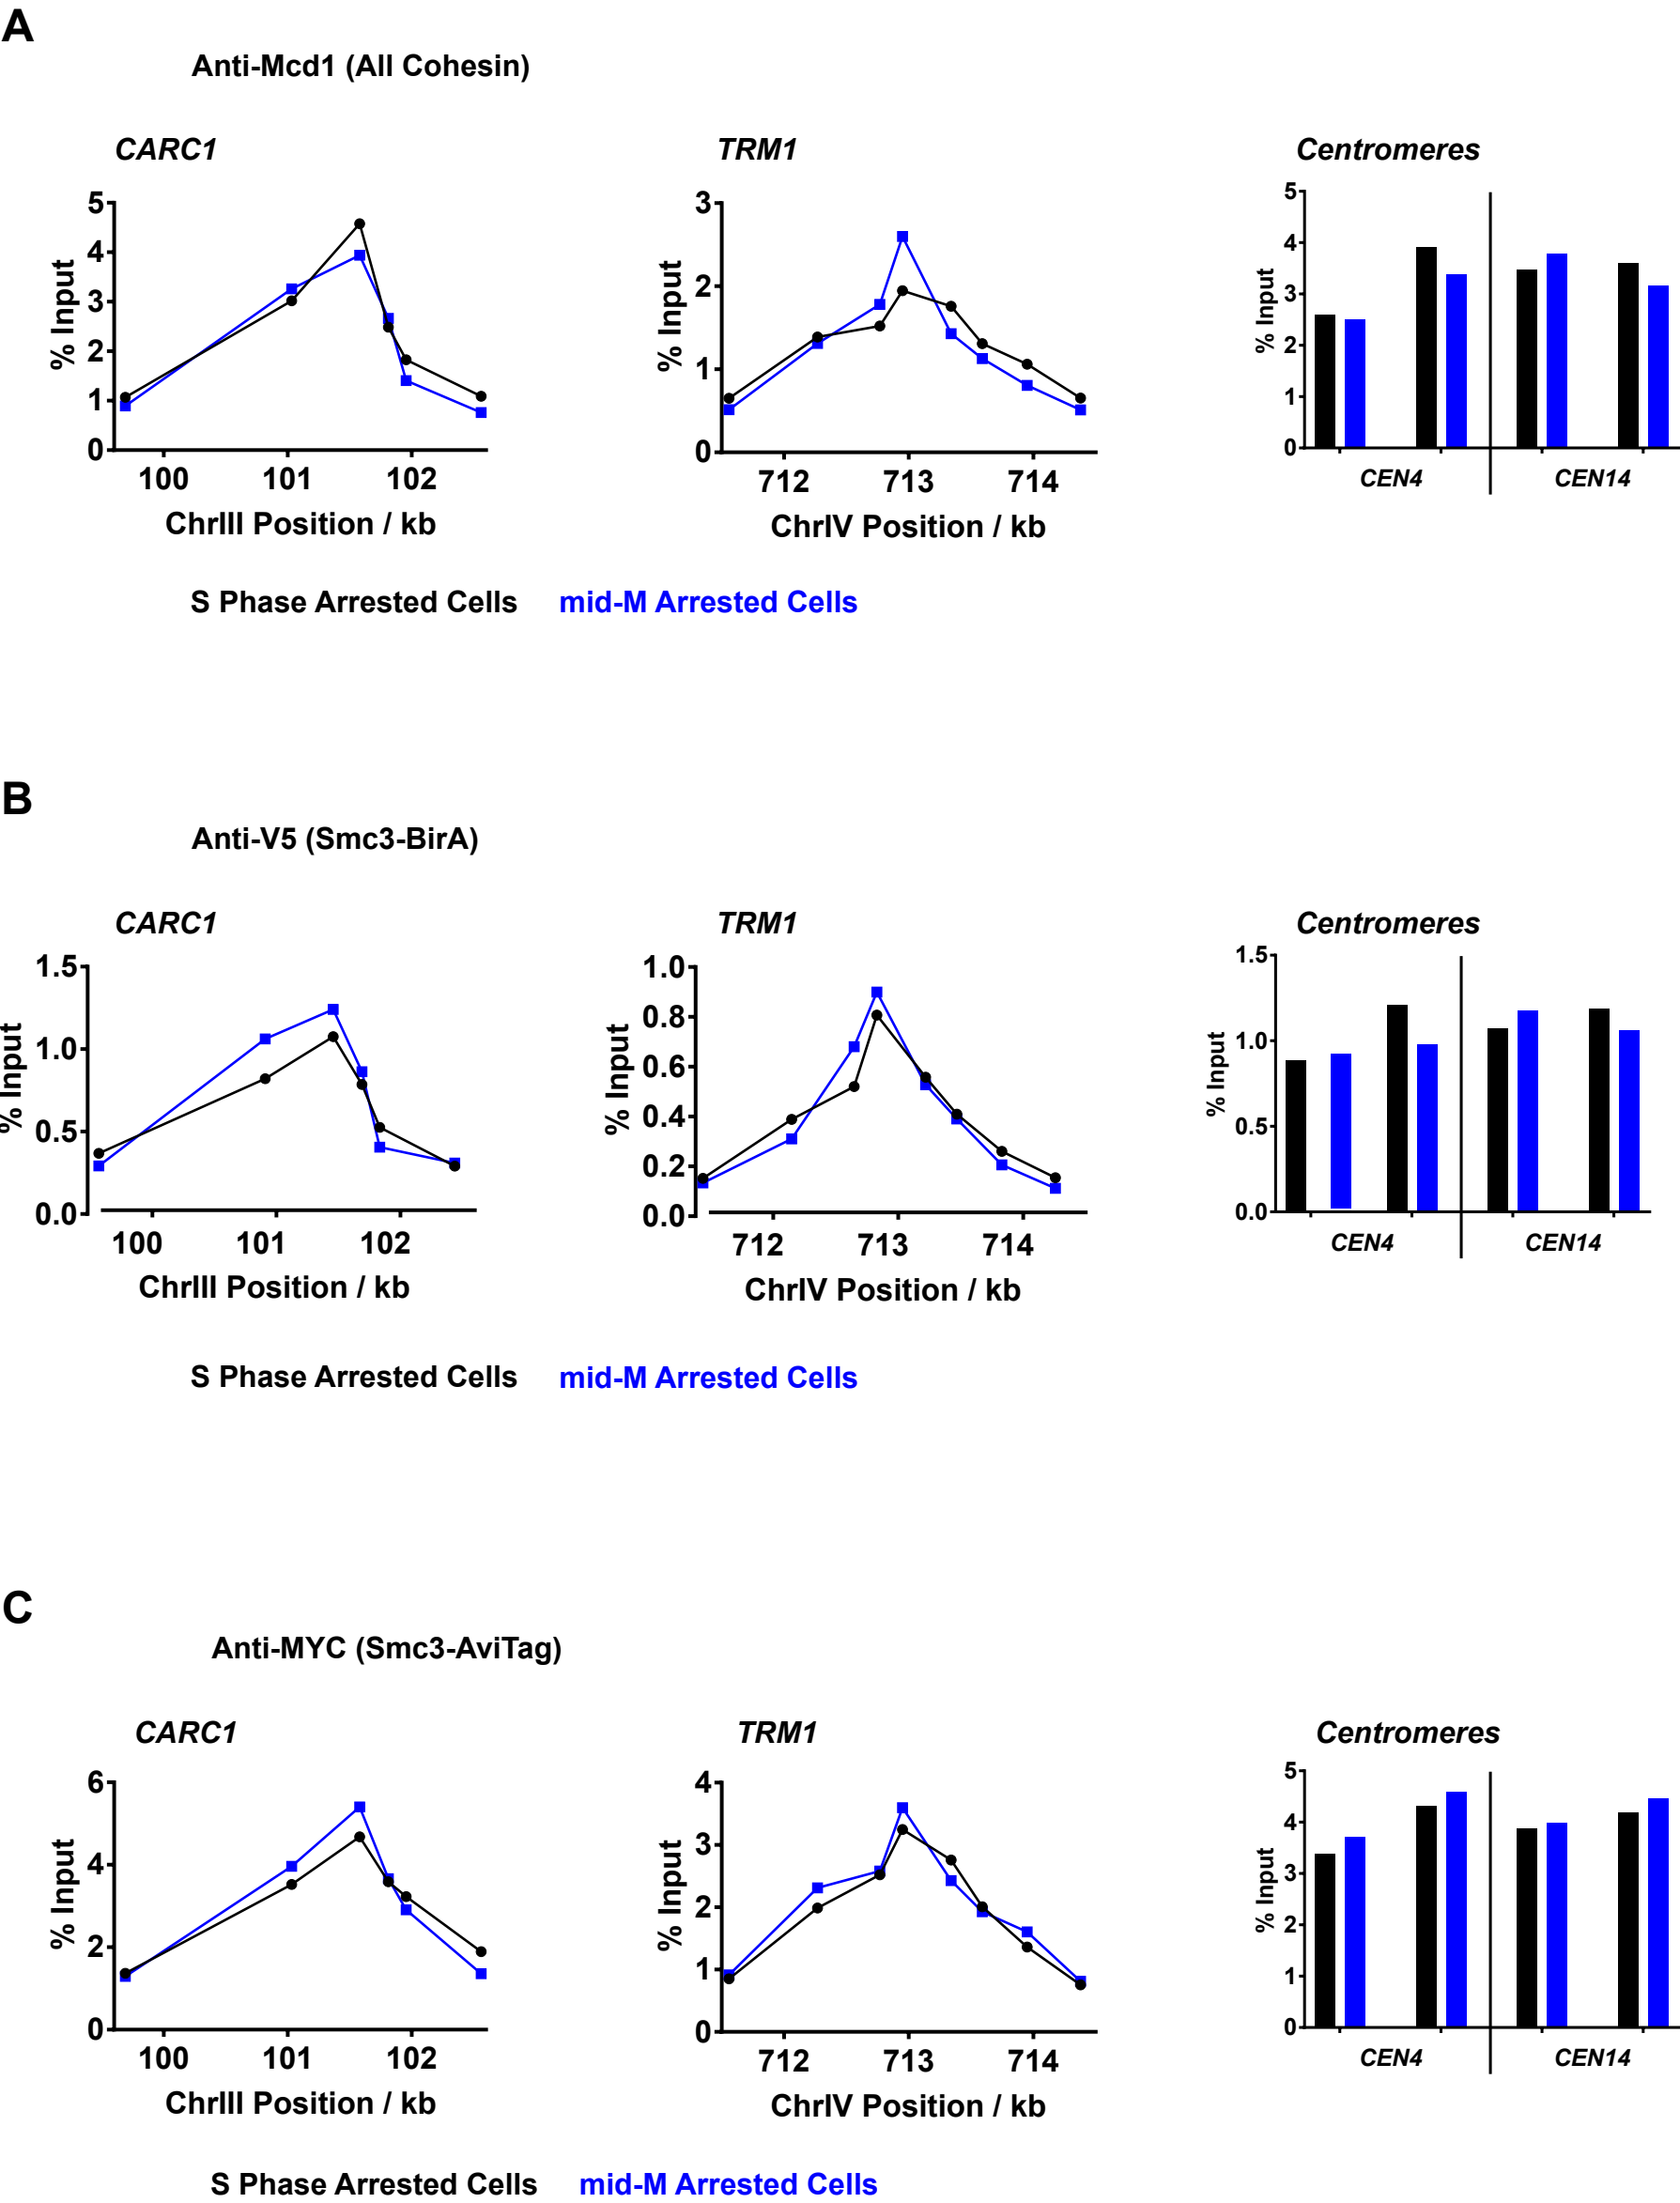

Supplement: supp [file elife-62243-supp-v1.zip › elife_poa_e62243_Figure_5_figure_supplement_2.pdf]

# Figure 6S1

**A**

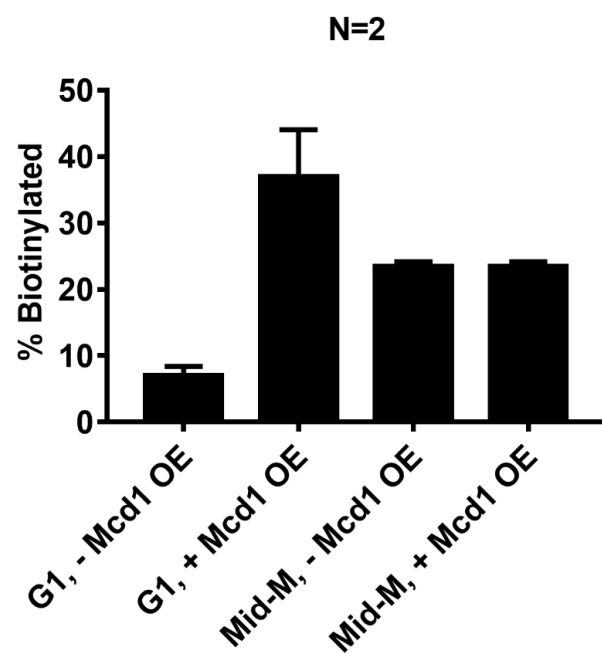

**B**

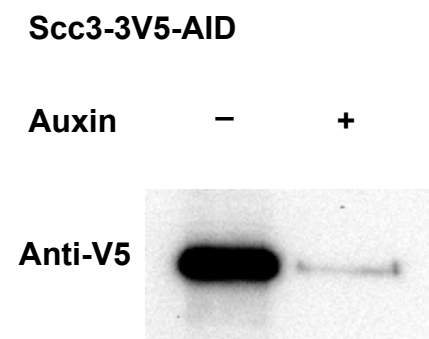

**C**

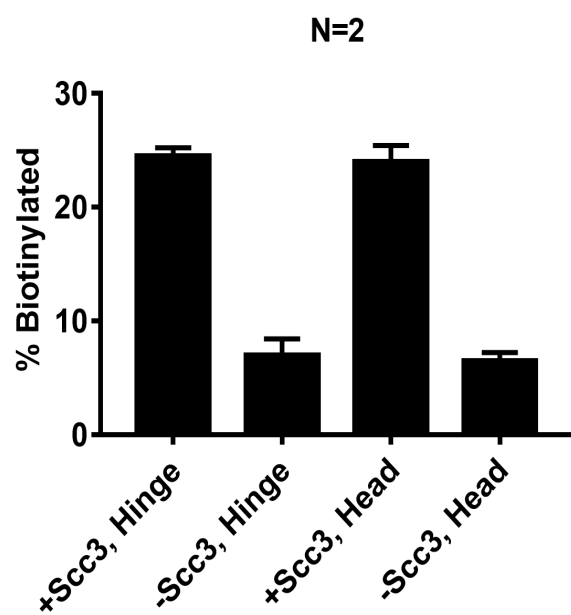

**D**

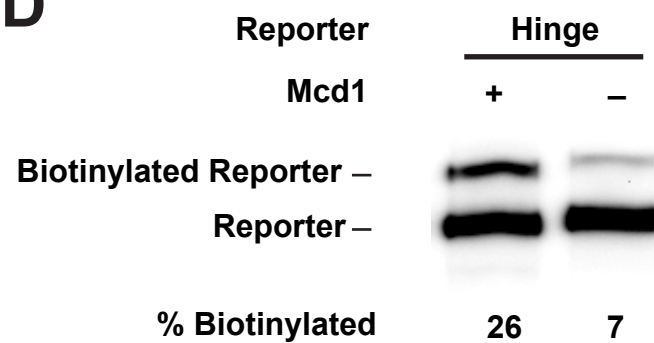

**E**

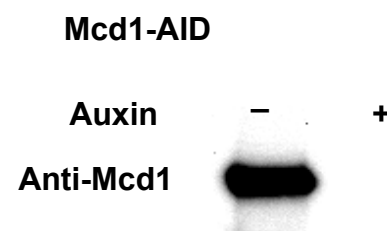

Supplement: supp [file elife-62243-supp-v1.zip › elife_poa_e62243_Figure_6_figure_supplement_1.pdf]

Figure 7S1

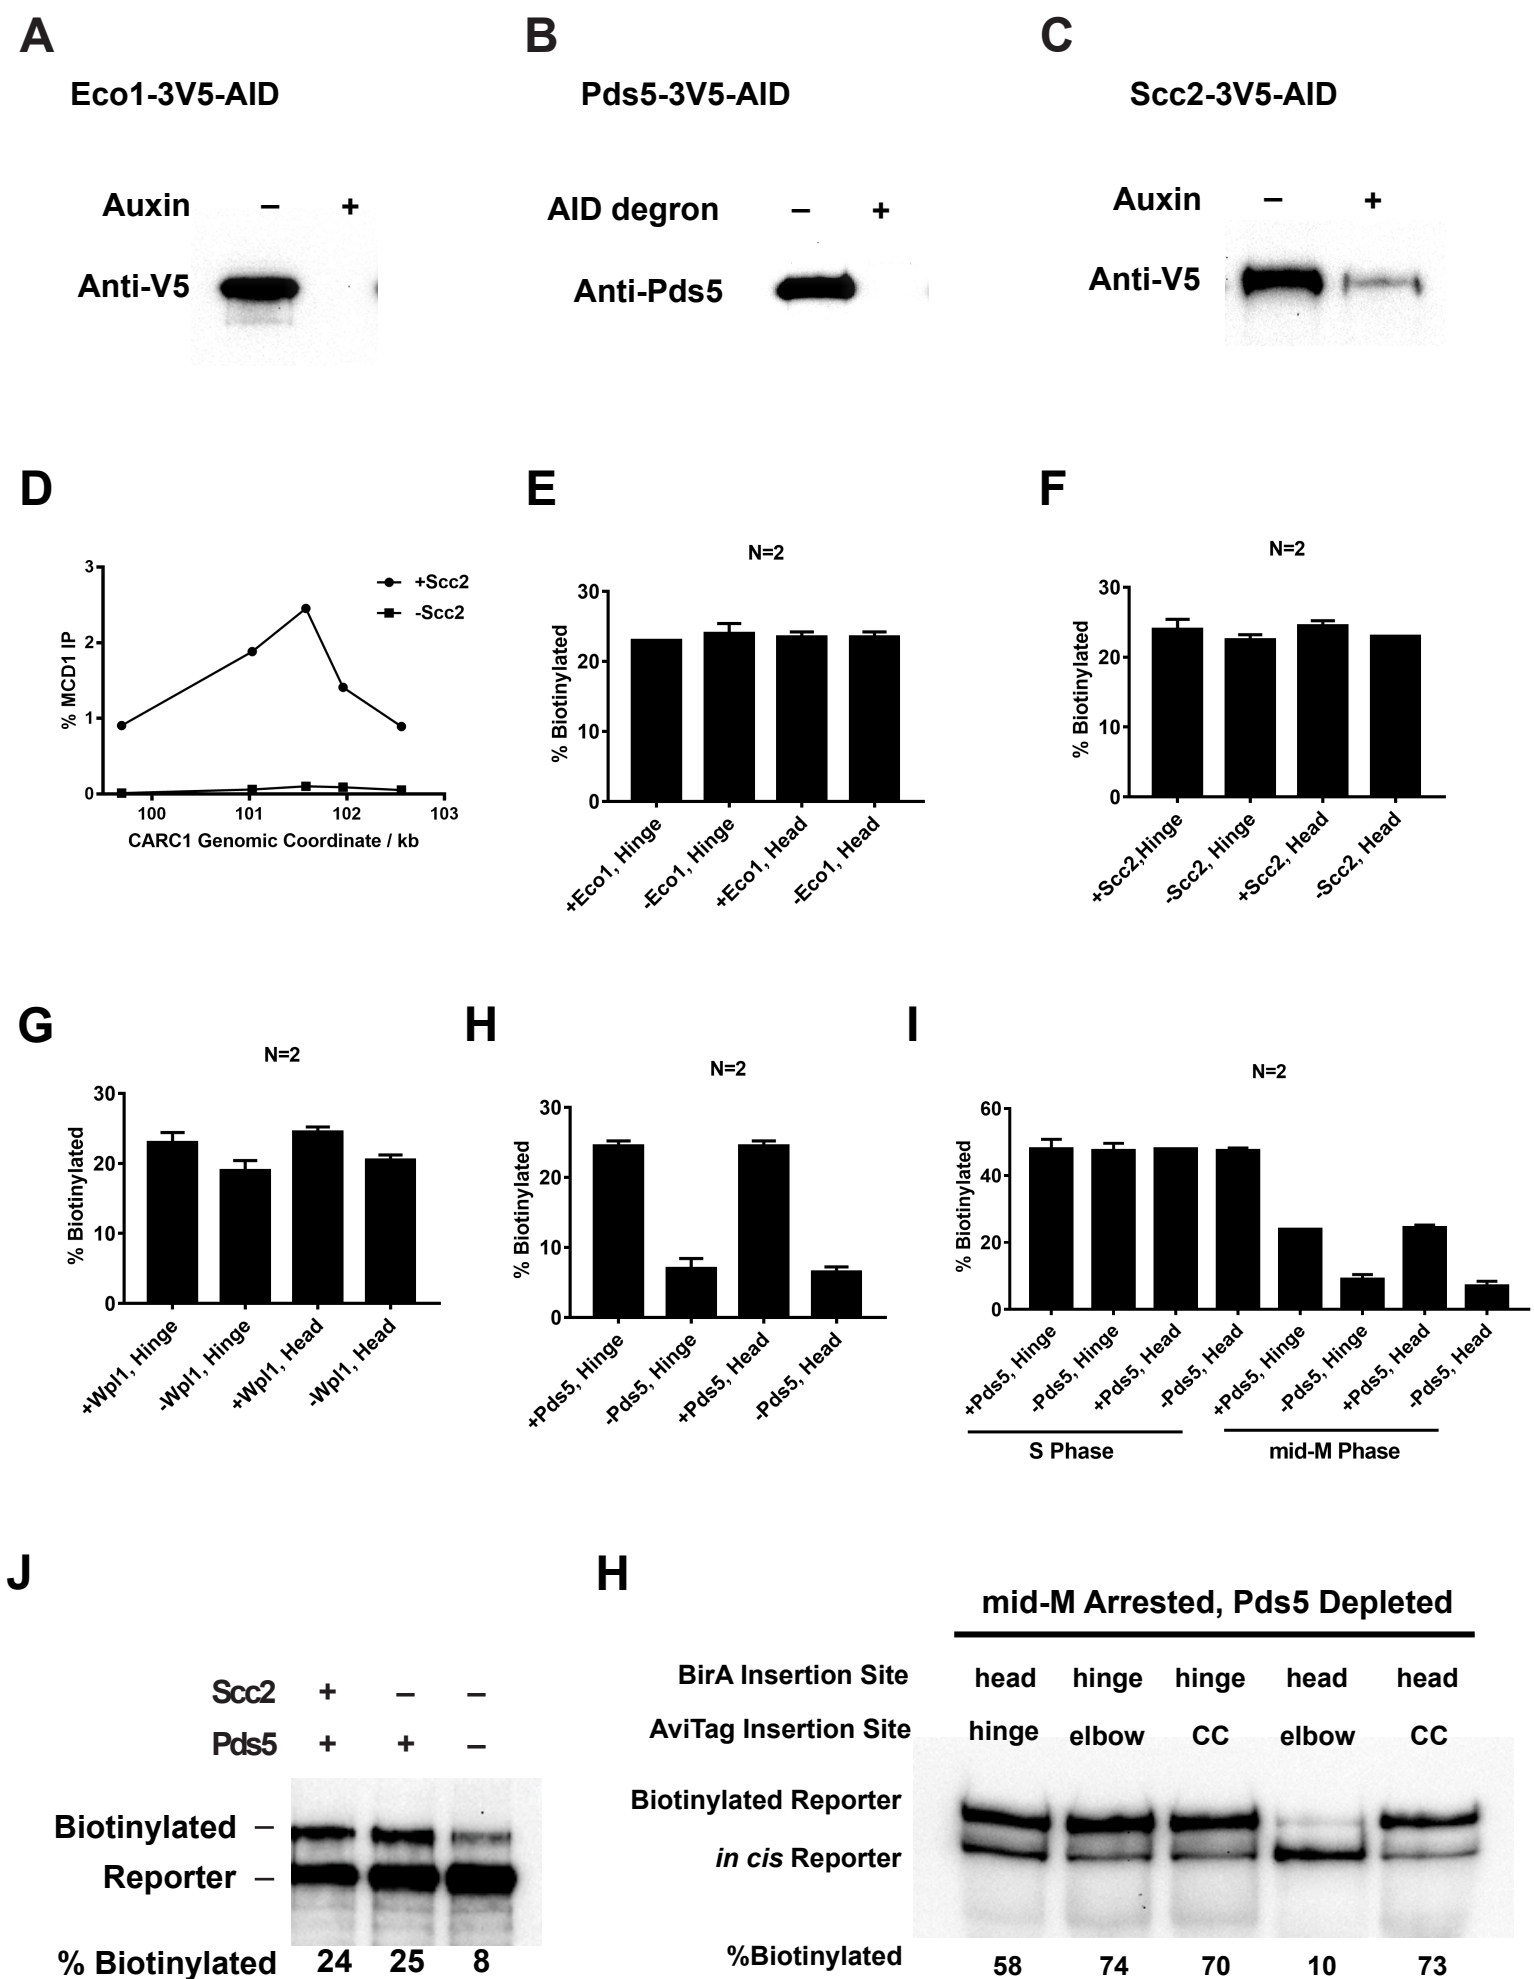

Supplement: supp [file elife-62243-supp-v1.zip › elife_poa_e62243_Figure_7_figure_supplement_1.pdf]

Figure 8S1

A

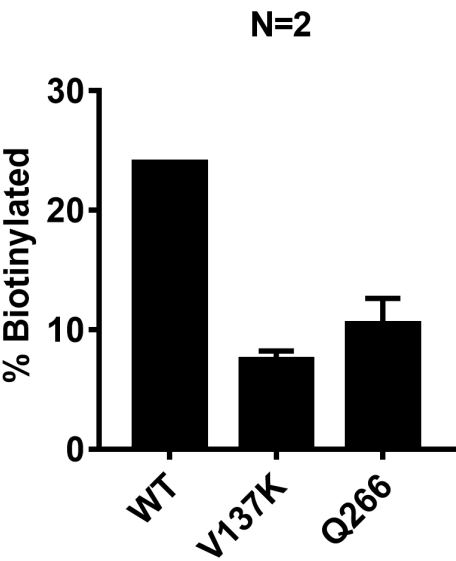

B

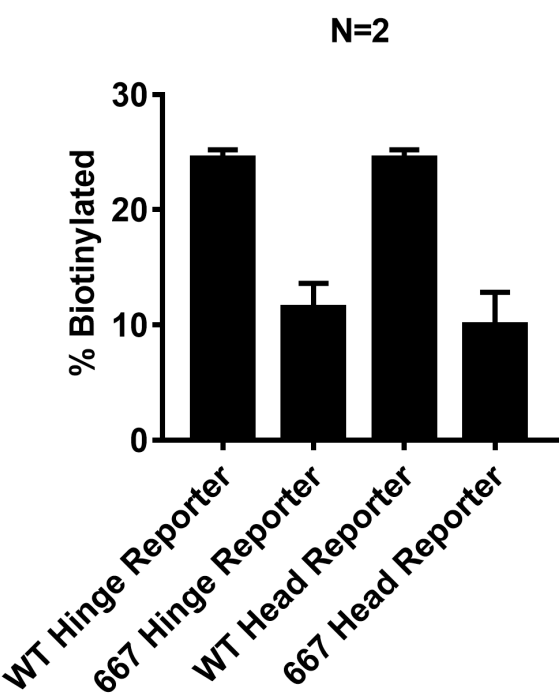

Supplement: supp [file elife-62243-supp-v1.zip › elife_poa_e62243_Figure_8_figure_supplement_1.pdf]
